# Supplementary material for: Identification of senescence-related lncRNA prognostic index correlating with prognosis and radiosensitivity in prostate cancer patients
Source: publisher site journal article supplement (doi:10.18632/aging.204888), 2023-09-23
Supplement: Supplementary file [file aging-v15i18-204888-supplementary-material-SD1.pdf]

**SUPPLEMENTARY FIGURES**

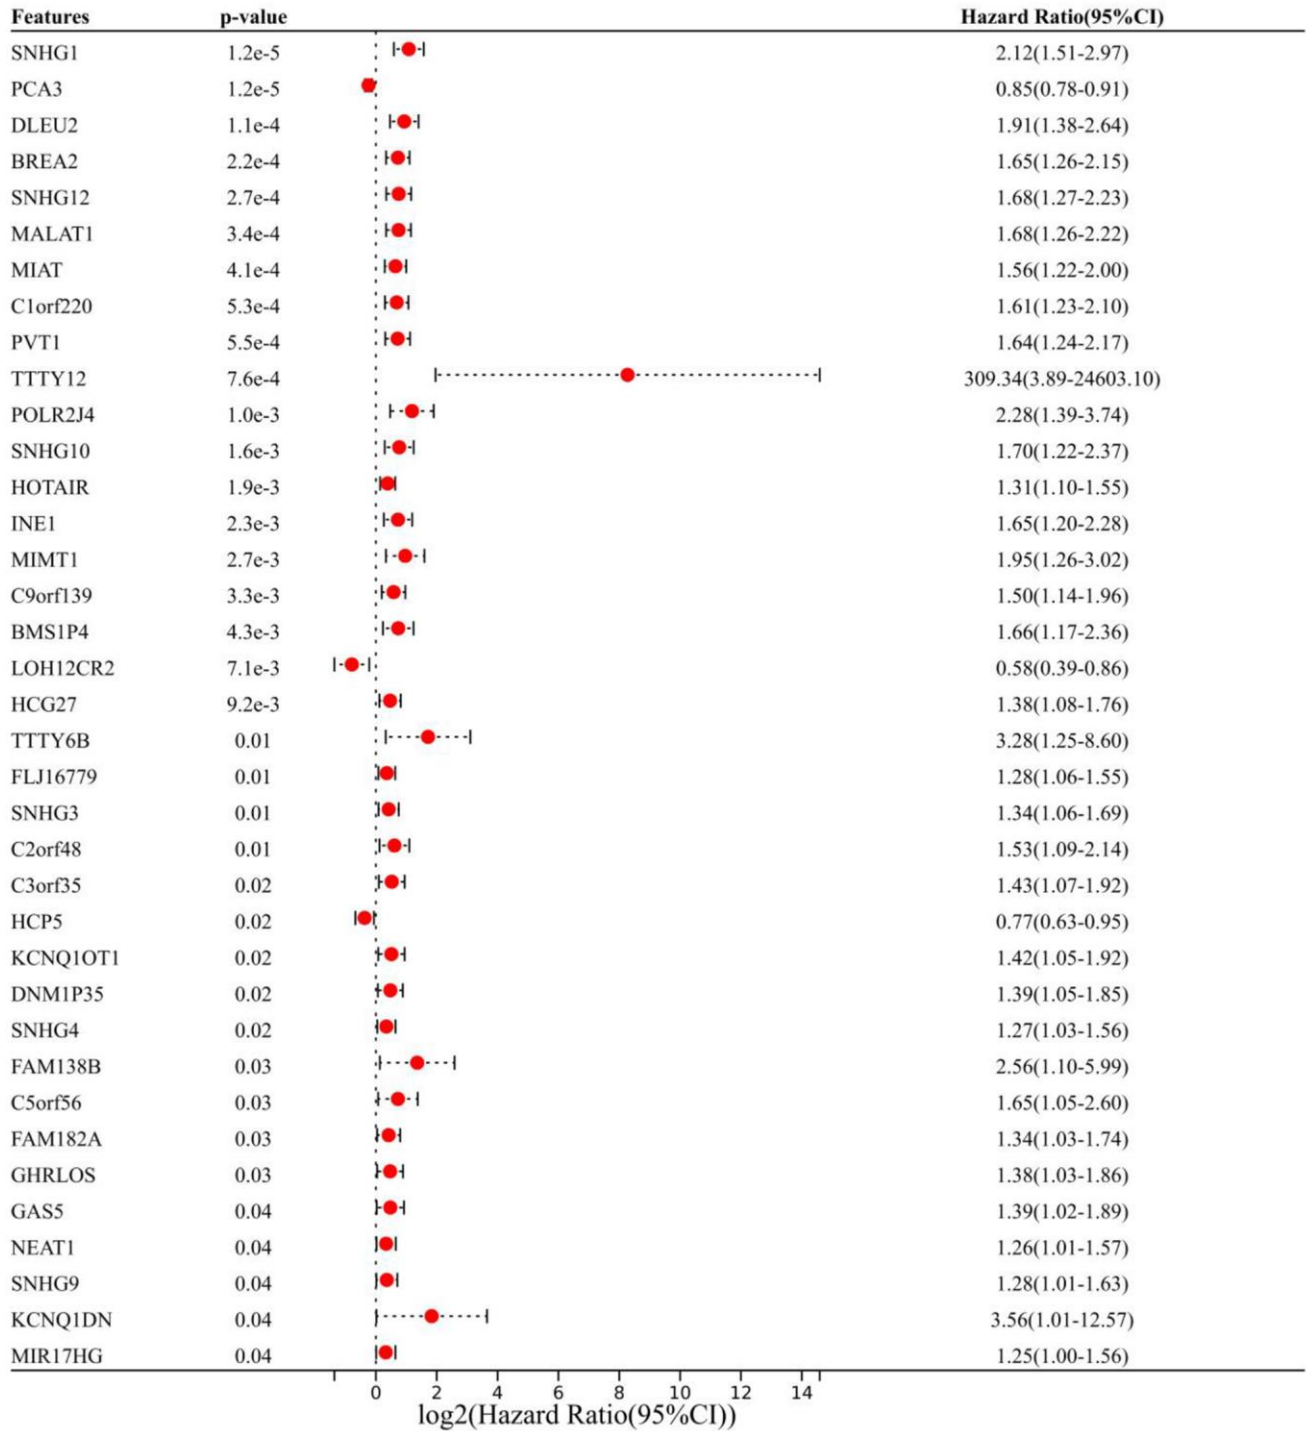

**Supplementary Figure 1. The prognosis analysis of lncRNAs in TCGA database.**

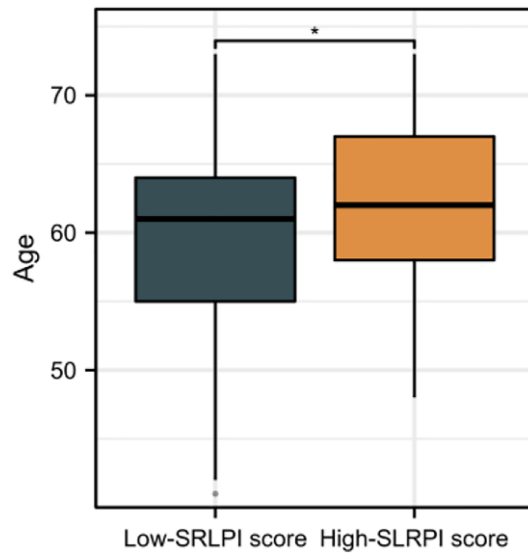

Supplementary Figure 2. The relationship of SRLPI score with age in the GSE70768.
